# Supplementary material for: Coking-resistant dry reforming of methane over BN–nanoceria interface-confined Ni catalysts
Source: Royal Society of Chemistry journal article supplement (doi:10.1039/d0cy00537a), 2020-01-01
Supplement: d0cy00537a1.pdf [file d0cy00537a1.pdf]

*Electronic Supplementary Information*

**Coking-resistant dry reforming of methane over BN-nanoceria interface-confined Ni catalysts**

Meirong Lu,<sup>a</sup> Xiaoyu Zhang,<sup>a</sup> Jiang Deng,<sup>a</sup> Sanchai Kuboon,<sup>b</sup> Kajornsak Faungnawakij,<sup>b</sup> Shengxiong Xiao,<sup>\*c</sup> and Dongsong Zhang<sup>\*a</sup>

<sup>a</sup> *Department of Chemistry, Research Center of Nano Science and Technology, College of Sciences, Shanghai University, No.99 Shangda Road, Shanghai 200444, P.R. China*

<sup>b</sup> *National Nanotechnology Center, National Science and Technology Development Agency, 111 Thailand Science Park, Pathum Thani 12120, Thailand*

<sup>c</sup> *Department of Chemistry, Shanghai Normal University, No.100 Guilin Road, Shanghai 200234, P.R. China*

*Corresponding author: E-mail: xiaosx@shnu.edu.cn, dszhang@shu.edu.cn.*

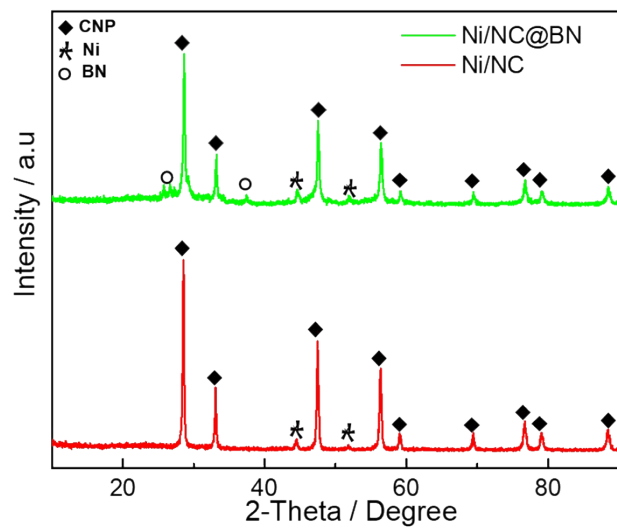

**Fig. S1** XRD patterns of Ni/NC and Ni/NC@BN catalysts.

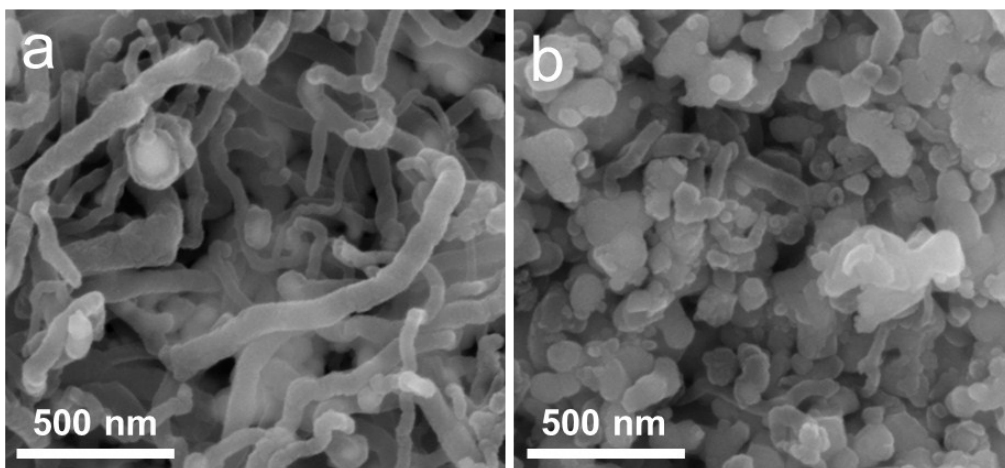

**Fig. S2** SEM images of (a) the spent Ni/NC catalyst after 20 h DRM reaction and (b) the spent Ni/NC@BN catalyst after 100 h DRM reaction.

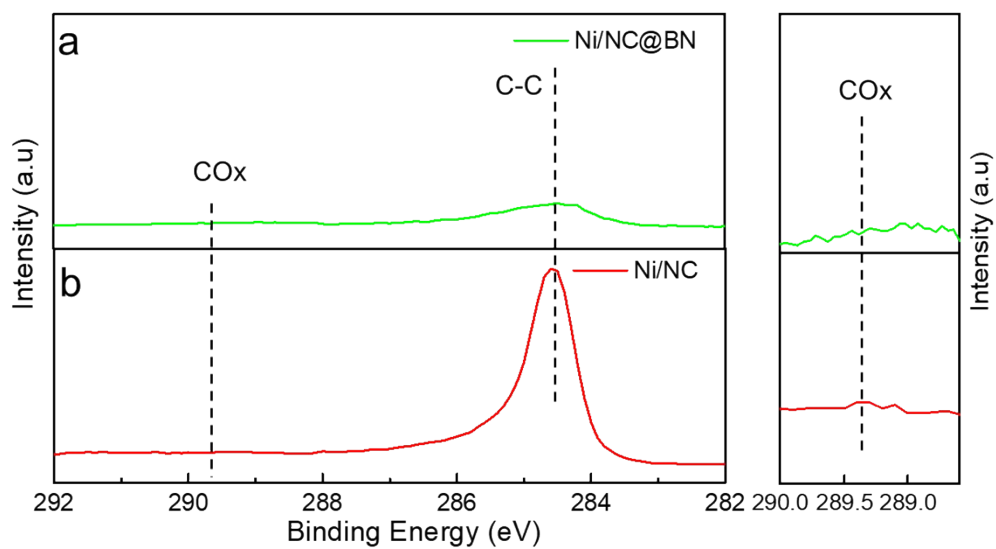

**Fig. S3** C1s XPS spectra of (a) the spent Ni/NC@BN catalyst after 100 h of DRM reaction and (b) the spent Ni/NC catalyst after 20 h of DRM reaction and zoomed in spectra in the range of 288–291 eV.

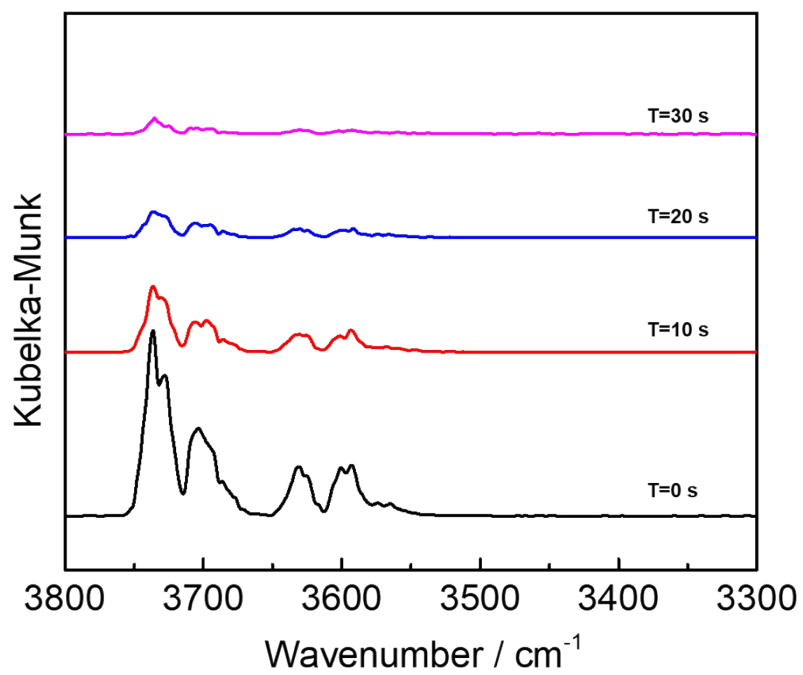

**Fig. S4** Enlarged figures of transient reactions over Ni/NC@BN and Ni/NC catalysts.

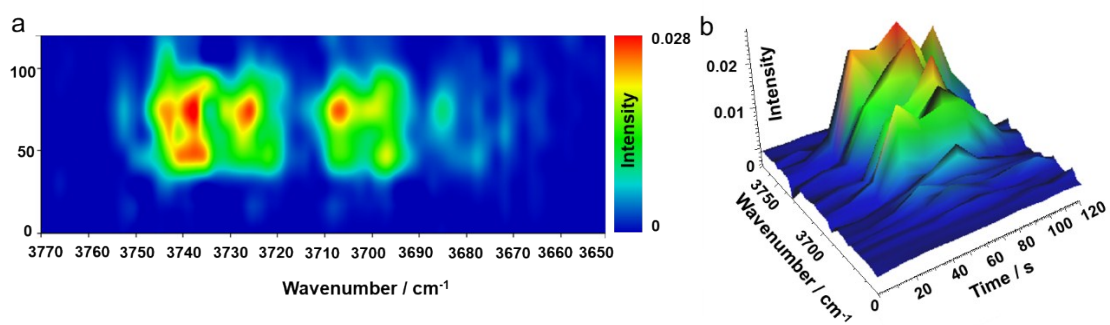

**Fig. S5** (a) 2D and (b) 3D *in situ* DRIFTS of DRM reaction over Ni/NC@BN catalyst where CH<sub>4</sub> and CO<sub>2</sub> with a flow rate of 25 mL/min was adsorption on the catalyst at 650 °C for 1 min and then CO<sub>2</sub> feed was switched off.

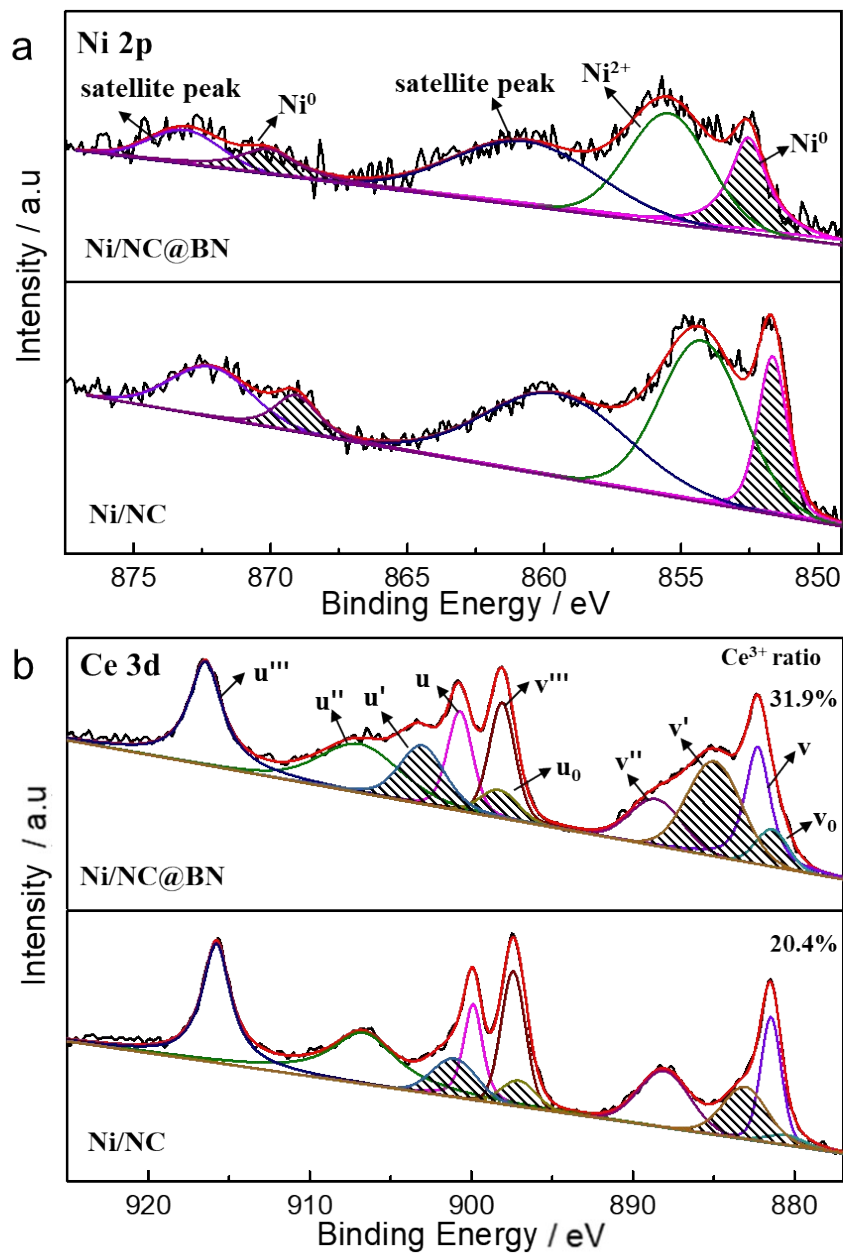

**Fig. S6** XPS spectra for (a) Ni 2p and (b) Ce 3d of Ni/NC and Ni/NC@BN catalysts.

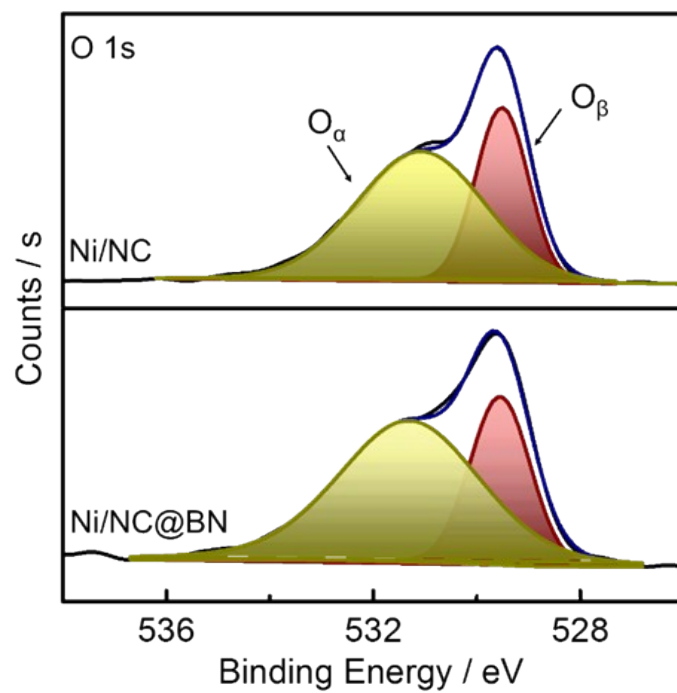

**Fig. S7** O 1s XPS spectra of Ni/NC and Ni/NC@BN catalysts.



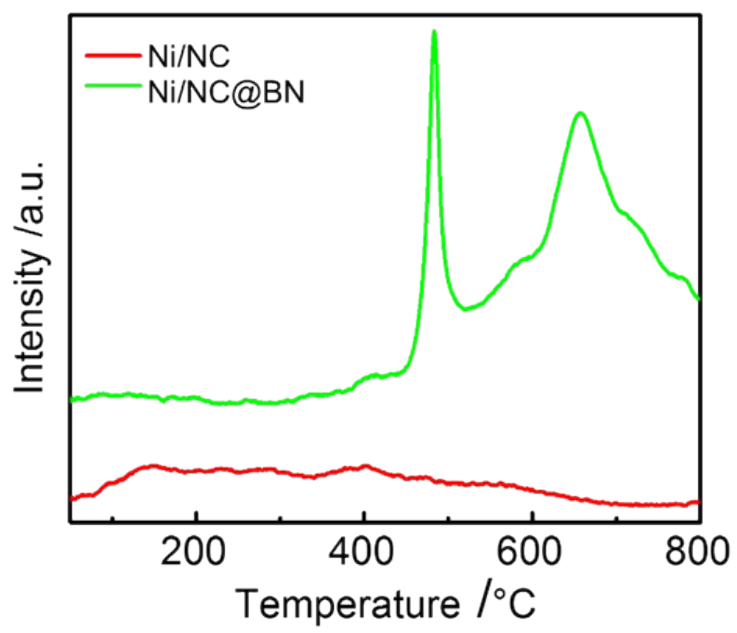

**Fig. S8** O<sub>2</sub>-TPD profiles of Ni/NC and Ni/NC@BN catalyst.

**Table S1** The concentration of O<sub>α</sub> from XPS and the corresponding desorption quantity of O<sub>2</sub> from O<sub>2</sub>-TPD.

| Catalyst | Concentration of O <sub>α</sub> (%) | O <sub>2</sub> desorption quantity (mmol/g) |
|----------|-------------------------------------|---------------------------------------------|
| Ni/NC    | 64.6%                               | 0.074                                       |
| Ni/NC@BN | 68.7%                               | 0.106                                       |

**Table S2** The TOF<sub>CH<sub>4</sub></sub> of the as-prepared catalysts during the DRM reaction at 550 °C and textural properties of the reduced catalysts.

| Catalysts | Ni loading <sup>a</sup> (%) | Temp. (°C) | Time X (h) | Specific surface area <sup>b</sup> (m <sup>2</sup> g <sup>-1</sup> ) | Ni dispersion <sup>c</sup> (%) | CH <sub>4</sub> conversion <sup>d</sup> (%) |                   | TOF <sub>CH<sub>4</sub></sub> <sup>e</sup> (h <sup>-1</sup> ) |
|-----------|-----------------------------|------------|------------|----------------------------------------------------------------------|--------------------------------|---------------------------------------------|-------------------|---------------------------------------------------------------|
|           |                             |            |            |                                                                      |                                | Initial                                     | after 6h reaction |                                                               |
| Ni/NC     | 6.83                        | 550        | 6          | 16.8                                                                 | 1.45%                          | 19.4                                        | 7.1               | 3217                                                          |
| Ni/NC@BN  | 7.31                        | 550        | 6          | 16.4                                                                 | 0.42%                          | 13.8                                        | 9.8               | 14218                                                         |

<sup>a</sup> Ni loading were measured by ICP.

<sup>b</sup> Specific surface area of the catalysts determined by the BET method.

<sup>c</sup> Ni dispersion was measured by H<sub>2</sub> pulse chemisorption.

<sup>d</sup> The CH<sub>4</sub> conversion was tested at 550°C with a CH<sub>4</sub> flow rate of 45 mL/min.

<sup>e</sup> The value of TOF was tested at 550°C with a CH<sub>4</sub> flow rate of 45 mL/min.

The textural properties of the as-prepared catalysts were investigated by N<sub>2</sub> adsorption–desorption techniques. As shown in Table S1, the BET specific surface area of Ni/NC was 16.8 m<sup>2</sup> g<sup>-1</sup> and the BET specific surface area of Ni/NC@BN was 16.4 m<sup>2</sup> g<sup>-1</sup>. The Ni dispersions of Ni/NC and Ni/NC@BN catalysts are 1.45% and 0.42%. The dispersion value of Ni/NC@BN was a bit lower than that of Ni/NC. The reduced ability of hydrogen chemisorption for Ni/NC@BN catalyst is likely caused by the strong metal support interaction (SMSI) between nickel and CeO<sub>2</sub>, which blocks the Ni active sites for hydrogen chemisorption<sup>[1, 2]</sup>. In addition, the better coke resistance of Ni/NC@BN could be attributed to the –OH species on the surface of BN. The strong interaction between Ni and BN-nanoceria (NC) interfaces plays a key role in suppressing metal sintering. Therefore, the excellent coking and sintering resistance makes the catalyst maintain better stability.

## References

- [1] S. Das, J. Ashok, Z. Bian, N. Dewangan, M.H. Wai, Y. Du, A. Borgna, K. Hidajat, S. Kawi, Silica–Cerium sandwiched Ni core–shell catalyst for low temperature dry reforming of biogas: Coke resistance and mechanistic insights, *Appl. Catal. B-Environ.* 230 (2018) 220-236.
- [2] H. Ay, D. Üner, Dry reforming of methane over CeO<sub>2</sub> supported Ni, Co and Ni–Co catalysts, *Appl. Catal. B-Environ.* 179 (2015) 128-138.
